# Supplementary material
Source: PubMed Central journal article supplement (PMC5710500)
Supplement: jamasurg-152-749-s001.pdf [file jamasurg-152-749-s001.pdf]

## Supplementary Online Content

Wahl TS, Graham LA, Hawn MT, et al. Association of the Modified Frailty Index with 30-day surgical readmissions. *JAMA Surg*. Published online May 3, 2017. doi:10.1001/jamasurg.2017.1025

**eTable.** Observed 30-Day Postoperative Outcomes by Frailty Component Type

This supplementary material has been provided by the authors to give readers additional information about their work.

**eTable.** Observed 30-Day Postoperative Outcomes by Frailty Component Type

| Frailty Component                                 |     | Unplanned Readmission |        | ED Utilization |        | In-Hospital Complication |        | Post-Discharge Complication |        | Post-Discharge Mortality |       |
|---------------------------------------------------|-----|-----------------------|--------|----------------|--------|--------------------------|--------|-----------------------------|--------|--------------------------|-------|
| Hypertension Requiring Medication                 | No  | 6,516                 | (9.3)  | 9,747          | (13.9) | 3,605                    | (5.2)  | 3,657                       | (5.2)  | 508                      | (0.7) |
|                                                   | Yes | 19,746                | (11.8) | 24,457         | (14.7) | 10,250                   | (6.1)  | 11,179                      | (6.7)  | 1,477                    | (0.9) |
| History of Diabetes Mellitus Requiring Medication | No  | 17,671                | (10.1) | 24,449         | (14.0) | 9,837                    | (5.6)  | 9,972                       | (5.7)  | 1,363                    | (0.8) |
|                                                   | Yes | 8,591                 | (13.8) | 9,755          | (15.7) | 4,018                    | (6.5)  | 4,864                       | (7.8)  | 622                      | (1.0) |
| Previous PCI/CABG or Angina                       | No  | 20,348                | (10.4) | 27,626         | (14.1) | 10,958                   | (5.6)  | 11,556                      | (5.9)  | 1,502                    | (0.8) |
|                                                   | Yes | 5,914                 | (14.6) | 6,578          | (16.2) | 2,897                    | (7.1)  | 3,280                       | (8.1)  | 483                      | (1.2) |
| History of COPD or Pneumonia                      | No  | 20,910                | (10.4) | 28,226         | (14.1) | 10,674                   | (5.3)  | 11,585                      | (5.8)  | 1,361                    | (0.7) |
|                                                   | Yes | 5,352                 | (14.8) | 5,978          | (16.6) | 3,181                    | (8.8)  | 3,251                       | (9.0)  | 624                      | (1.7) |
| Dependent Functional Status                       | No  | 21,676                | (10.2) | 30,373         | (14.3) | 11,446                   | (5.4)  | 11,712                      | (5.5)  | 981                      | (0.5) |
|                                                   | Yes | 4,586                 | (18.6) | 3,831          | (15.5) | 2,409                    | (9.8)  | 3,124                       | (12.7) | 1,004                    | (4.1) |
| Peripheral Vascular Disease                       | No  | 22,025                | (10.3) | 30,566         | (14.2) | 12,443                   | (5.8)  | 12,409                      | (5.8)  | 1,660                    | (0.8) |
|                                                   | Yes | 4,237                 | (19.2) | 3,638          | (16.5) | 1,412                    | (6.4)  | 2,427                       | (11.0) | 325                      | (1.5) |
| TIA/CVA without residual deficit                  | No  | 23,759                | (10.8) | 31,427         | (14.3) | 12,630                   | (5.7)  | 13,428                      | (6.1)  | 1,731                    | (0.8) |
|                                                   | Yes | 2,503                 | (14.7) | 2,777          | (16.3) | 1,225                    | (7.2)  | 1,408                       | (8.3)  | 254                      | (1.5) |
| CVA with residual deficit                         | No  | 24,697                | (10.9) | 32,688         | (14.4) | 13,033                   | (5.7)  | 13,945                      | (6.1)  | 1,806                    | (0.8) |
|                                                   | Yes | 1,565                 | (16.2) | 1,516          | (15.7) | 822                      | (8.5)  | 891                         | (9.2)  | 179                      | (1.9) |
| History of CHF within 30 days                     | No  | 25,741                | (11.0) | 33,777         | (14.4) | 13,586                   | (5.8)  | 14,493                      | (6.2)  | 1,875                    | (0.8) |
|                                                   | Yes | 521                   | (23.6) | 427            | (19.3) | 269                      | (12.2) | 343                         | (15.5) | 110                      | (5.0) |
| Acutely Impaired                                  | No  | 25,904                | (11.0) | 33,927         | (14.4) | 13,603                   | (5.8)  | 14,524                      | (6.2)  | 1,833                    | (0.8) |

|                               |     |        |        |        |        |        |        |        |        |       |       |
|-------------------------------|-----|--------|--------|--------|--------|--------|--------|--------|--------|-------|-------|
| Sensorium                     |     |        |        |        |        |        |        |        |        |       |       |
|                               | Yes | 358    | (22.5) | 277    | (17.4) | 252    | (15.9) | 312    | (19.6) | 152   | (9.6) |
| History of MI within 6 Months | No  | 25,969 | (11.0) | 33,960 | (14.4) | 13,698 | (5.8)  | 14,648 | (6.2)  | 1,930 | (0.8) |
|                               | Yes | 293    | (21.3) | 244    | (17.7) | 157    | (11.4) | 188    | (13.6) | 55    | (4.0) |
| All P < 0.001                 |     |        |        |        |        |        |        |        |        |       |       |

ED, Emergency Department; PCI, Percutaneous Coronary Intervention; CABG, Coronary Artery Bypass Grafting; COPD, Chronic Obstructive Pulmonary Disease; TIA, Transient Ischemic Attack; CVA, Cerebrovascular accident; CHF, Congestive Heart Failure; MI, Myocardial Infarction
